# Supplementary material for: The effect of a spinal thrust manipulation’s audible pop on brain wave activity: a quasi-experimental repeated measure design
Source: PeerJ. 2024 Jun 28;12:e17622. doi: 10.7717/peerj.17622 (PMC11216216; doi:10.7717/peerj.17622)
Supplement: Supplemental Information 1 [file peerj-12-17622-s001.xlsx]

## Sheet: Sheet1
NO POP	POW.AF3.Theta	POW.AF3.Alpha	POW.AF3.BetaL	POW.AF3.BetaH	POW.AF3.Gamma	POW.F7.Theta	POW.F7.Alpha	POW.F7.BetaL	POW.F7.BetaH	POW.F7.Gamma	POW.F3.Theta	POW.F3.Alpha	POW.F3.BetaL	POW.F3.BetaH	POW.F3.Gamma	POW.FC5.Theta	POW.FC5.Alpha	POW.FC5.BetaL	POW.FC5.BetaH	POW.FC5.Gamma	POW.T7.Theta	POW.T7.Alpha	POW.T7.BetaL	POW.T7.BetaH	POW.T7.Gamma	POW.P7.Theta	POW.P7.Alpha	POW.P7.BetaL	POW.P7.BetaH	POW.P7.Gamma	POW.O1.Theta	POW.O1.Alpha	POW.O1.BetaL	POW.O1.BetaH	POW.O1.Gamma	POW.O2.Theta	POW.O2.Alpha	POW.O2.BetaL	POW.O2.BetaH	POW.O2.Gamma	POW.P8.Theta	POW.P8.Alpha	POW.P8.BetaL	POW.P8.BetaH	POW.P8.Gamma	POW.T8.Theta	POW.T8.Alpha	POW.T8.BetaL	POW.T8.BetaH
Pre 1	1.14656	0.636551	0.206079	0.117476	0.0912998	0.62457	0.672316	0.231811	0.152609	0.119766	0.746869	1.55966	0.255754	0.188267	0.154343	0.623929	0.44987	0.229658	0.124541	0.07237	0.118325	0.101693	0.113194	0.0520794	0.0751508	0.597302	1.208	0.37662	0.244737	0.260045	1.92537	2.73764	0.690467	0.393619	0.327009	23.4566	7.15324	2.21348	0.94266	0.48968	70.8815	19.9278	6.25315	2.40986	1.07133	0.352241	0.380266	0.370196	0.27064
Post 1	1.48663	0.582294	0.278078	0.159641	0.0982475	0.531686	0.443988	0.174213	0.137558	0.10329	0.547785	1.1135	0.254447	0.176973	0.118805	0.931105	0.510944	0.326052	0.179375	0.100401	0.0578033	0.0473248	0.056675	0.0584572	0.0742675	0.760481	1.48253	0.411739	0.208667	0.154752	0.931303	2.38728	0.989342	0.251939	0.199996	1.78746	1.28744	0.554799	0.269446	0.193799	2.26573	2.28661	0.848028	0.456948	0.266759	0.248887	0.368884	0.224941	0.278911
Pre 2	1.79351	4.12857	1.03588	0.69214	0.323784	1.1223	3.04868	0.878812	0.596652	0.432032	1.24714	2.8332	0.784656	0.511994	0.250711	0.894897	2.10867	0.709731	0.476559	0.332837	0.0851924	0.112544	0.118587	0.108539	0.118528	0.679926	1.37991	0.354524	0.281008	0.209508	1.45428	4.79409	0.725635	0.409962	0.211264	2.60951	8.3709	1.10341	0.674754	0.396055	0.788283	2.69722	0.682481	0.751568	0.567543	0.32887	0.364051	0.377845	0.259116
Post 2	2.3973	4.2078	1.26622	0.7023	0.402811	1.52295	3.10732	0.948772	0.856526	0.991322	1.57115	2.70427	0.937602	0.501492	0.291796	1.03997	2.00371	0.835824	0.54899	0.439875	0.0817124	0.0913267	0.0754946	0.066371	0.0896531	0.646028	2.66317	0.482203	0.323937	0.238322	2.65535	11.1966	1.1289	0.617301	0.255063	2.88851	18.1577	1.1388	0.824815	0.40065	0.936704	3.83258	0.75586	0.80499	0.562076	0.341806	0.252756	0.213251	0.246188
Pre 3	2.99766	15.0573	1.18103	1.06792	0.632149	2.11657	8.93601	1.19472	1.36023	0.962207	2.88038	13.4347	1.07644	0.936819	0.563273	1.75036	7.41692	1.27164	1.62311	1.06054	0.0189834	0.0178321	0.0122166	0.0118665	0.0149853	1.40507	4.61663	0.754871	0.503219	0.385557	1.79538	3.59221	1.03388	0.670121	0.439457	2.52101	7.37401	1.52282	0.834619	0.525085	2.68397	7.83723	1.84354	1.03174	0.745396	0.0252316	0.0271144	0.0210033	0.0185939
Post 3	8.53156	17.9048	2.6067	3.96924	5.55547	9.72239	11.6492	1.55177	2.41396	2.32452	8.59289	14.9508	1.65128	2.03282	2.19165	10.2397	9.2717	1.80742	3.20895	3.07238	0.149594	0.194033	0.142886	0.1167	0.106664	8.06143	7.9579	0.954842	0.894768	0.639452	8.85571	6.29119	1.36441	1.26436	0.969664	8.02194	7.22003	1.46182	1.31678	1.02097	8.21804	6.95491	1.50368	1.67183	1.409	0.224025	0.176949	0.206722	0.136544
Pre 4	0.798511	1.29847	0.521941	0.276873	0.157	0.99275	1.38892	0.583568	0.446021	0.266017	0.738838	1.12314	0.525361	0.283696	0.156979	0.962286	1.28506	0.579333	0.295976	0.16712	0.0832057	0.0953365	0.0595029	0.0573041	0.0835241	0.391336	0.28247	0.22532	0.141399	0.0836822	0.758777	4.02954	1.04002	0.473646	0.150211	1.39468	7.71129	2.40596	1.22051	0.228677	1.29993	3.12316	1.84226	1.12091	0.248675	0.33914	0.311123	0.289121	0.237313
Post 4	0.97769	1.73854	0.520713	0.314741	0.154872	0.901422	1.9858	0.490111	0.346493	0.198645	0.862118	1.62152	0.60209	0.329744	0.135402	0.928796	1.88618	0.487101	0.325873	0.146665	0.0891441	0.0933483	0.0661512	0.0684036	0.0913239	0.545816	0.368359	0.20154	0.132947	0.0746107	0.780085	4.50962	1.13866	0.493548	0.147517	1.27731	8.35186	2.34665	1.04664	0.207584	1.51242	3.65968	2.12919	0.986125	0.230519	0.303089	0.350614	0.324071	0.29177
Pre 5	18.6904	4.03919	2.53129	1.014	0.338853	3.89583	1.84669	0.955998	0.543386	0.30161	1.66698	1.05004	0.624951	0.370083	0.247934	1.09226	0.688053	0.374122	0.237349	0.188849	0.212125	0.118707	0.100964	0.115562	0.123232	12.4998	4.616	2.22192	0.968305	0.420516	1.64174	0.985136	0.687439	0.375881	0.244077	1.42703	0.969143	1.28498	0.525788	0.325918	2.40872	1.18748	1.00999	0.416023	0.296662	0.171607	0.197325	0.155627	0.10754
Post 5	8.53952	4.73981	0.986392	0.64613	0.350973	8.54677	3.77189	1.17274	0.78172	0.477677	10.4226	6.60766	1.35715	0.815461	0.328415	3.58785	2.03339	0.901103	0.402996	0.268331	0.150159	0.128209	0.126814	0.113146	0.117648	2.09372	0.832494	0.37124	0.190474	0.151343	5.96804	2.52711	1.06215	0.365077	0.287312	7.11234	3.60211	1.69703	0.56724	0.336773	9.99837	4.25477	1.36942	0.604989	0.392467	0.147177	0.157358	0.152278	0.0976019
Pre 6	1.89113	3.82002	0.816264	0.650152	0.281623	1.75516	2.52168	0.867496	1.21458	0.635401	0.254976	0.466091	0.1665	0.12006	0.0788095	0.396646	0.381814	0.271824	0.232411	0.173955	0.072689	0.0493109	0.0376356	0.0352634	0.0355534	0.476844	0.842302	0.494884	0.194395	0.192062	0.84169	6.13626	1.95732	0.423248	0.221253	2.98172	22.0892	7.17299	0.986578	0.369973	3.34182	4.49153	2.24247	1.57676	0.840102	0.355618	0.349829	0.379653	0.26566
Post 6	66.8581	29.3067	8.2243	1.60052	0.460247	175.637	30.7805	11.1072	4.4786	0.998759	0.598324	0.618571	0.304494	0.139666	0.0859282	1.88049	0.834117	0.356195	0.314081	0.189174	0.0997774	0.0600618	0.0517224	0.0435725	0.0426791	1.7634	1.57933	0.915249	0.377877	0.190204	9.58356	8.96154	2.4676	0.596433	0.251494	15.1061	33.7579	12.0679	1.36777	0.45912	71.8641	9.66519	3.9123	2.12375	1.23324	0.43872	0.432585	0.343152	0.285767
Pre 7	8.50412	4.10974	3.18813	1.48724	1.04947	35.1628	13.6357	5.81856	1.49714	1.14957	8.5664	2.01145	1.58806	0.720531	0.569499	3.39877	1.34443	1.15381	0.755756	1.63498	0.131291	0.0881016	0.0995727	0.0569676	0.0830698	4.61043	1.45175	1.64246	2.241	2.58059	7.90028	2.03729	1.57084	0.677009	0.540539	11.7784	3.13856	1.93568	0.722283	0.662782	6.12479	2.14522	1.92665	2.22261	2.56134	0.334546	0.341276	0.380156	0.288995
Post 7	1.28164	1.22078	1.17477	0.68508	0.418259	1.80976	1.05285	0.977526	0.793156	0.538393	0.940046	0.770283	0.778709	0.626682	0.37523	0.654011	0.76337	0.913285	0.875997	0.643287	0.212151	0.371354	0.250628	0.196475	0.212634	0.49991	0.611423	0.827695	1.02742	1.23014	0.543951	0.694694	0.532549	0.50173	0.388189	0.828925	0.990736	0.724304	0.494299	0.374055	4.59135	1.08291	1.13908	0.832929	0.776856	0.403915	0.357168	0.313051	0.243044
Pre 8	0.712377	0.517674	0.308819	0.274719	0.117892	5.36489	1.54907	0.826266	0.279032	0.10717	0.724242	0.33205	0.181047	0.131412	0.064809	0.999443	0.436048	0.229533	0.197092	0.0886852	0.0343015	0.036933	0.0433471	0.0351511	0.0379961	0.438794	0.265751	0.104074	0.0856888	0.066713	0.541685	0.462659	0.216102	0.219441	0.102064	3.39214	1.00241	0.453261	0.252103	0.102874	10.0109	2.73505	1.18979	0.726669	0.25445	0.246521	0.214622	0.20821	0.174662
Post 8	0.890709	0.571114	0.444284	0.239264	0.127977	5.9199	2.0755	0.711635	0.242079	0.107445	0.676581	0.233581	0.169499	0.106301	0.0585874	0.962426	0.412124	0.291136	0.136504	0.0897097	0.0351862	0.0543482	0.0437658	0.0381002	0.0473446	0.610867	0.237242	0.157484	0.0760716	0.0589055	0.873456	0.455819	0.294796	0.198958	0.10177	0.405198	0.274088	0.229082	0.145022	0.0791466	1.24766	0.692002	0.730208	0.298406	0.17163	0.19322	0.125417	0.142869	0.13043
Pre 9	2.55841	3.02321	0.361196	0.240242	0.15198	1.86108	2.74043	0.378519	0.275679	0.183808	1.50194	1.89531	0.340316	0.189347	0.138784	1.44738	1.74641	0.341007	0.182448	0.140584	0.0506569	0.0395994	0.0351463	0.0384056	0.0516826	0.871801	0.464636	0.238136	0.111208	0.0813677	1.17576	2.37927	0.562134	0.228007	0.149804	1.91405	3.65985	0.7693	0.327116	0.23835	1.95742	1.80088	0.55031	0.31783	0.265042	0.114945	0.123249	0.101178	0.0923498
Post 9	2.26199	3.10494	0.449538	0.215774	0.214904	1.45372	2.42998	0.473452	0.280111	0.23938	1.46164	1.7773	0.291765	0.198501	0.173122	1.00155	1.5582	0.312763	0.195681	0.188171	0.0205428	0.0196516	0.0149524	0.0150819	0.0156195	1.34829	0.58572	0.29172	0.183174	0.10043	1.31292	2.79842	0.48207	0.266048	0.180284	2.12068	3.82365	0.768413	0.40235	0.26741	1.64644	1.91668	0.794766	0.407673	0.375685	0.136223	0.133096	0.104887	0.0769619
Pre 10	2.546	4.48365	1.27699	0.565954	0.232771	1.87278	2.28392	0.992301	0.547146	0.306979	13.9457	5.38158	1.93336	1.29008	0.40904	1.34706	1.78218	0.62083	0.339325	0.168684	0.127362	0.10345	0.0967348	0.108253	0.107101	1.71224	2.6159	1.42297	0.398846	0.170562	2.49636	4.2083	2.3228	0.443778	0.163848	3.39498	3.7823	1.70801	0.427163	0.13713	0.501176	2.27271	0.881596	0.308438	0.207047	0.327212	0.358089	0.320207	0.28176
Post 10	13.059	4.50134	2.07809	0.785179	0.245081	9.83308	2.80867	1.21529	0.699241	0.291819	4.97877	1.78382	0.99015	0.392099	0.173045	5.68669	1.95522	0.909927	0.437467	0.194238	0.0721841	0.102603	0.0848361	0.0698564	0.077269	7.05458	2.91724	2.04235	0.551015	0.272538	9.33209	3.31908	2.79987	0.547759	0.236829	17.3176	7.41858	2.92762	1.01558	0.347016	2.66478	2.93406	1.2435	0.410015	0.242858	0.29963	0.372579	0.319266	0.289582
Pre 11	21.8377	10.9358	5.66363	3.72878	1.81816	25.68	12.7776	6.33047	3.88104	1.90222	7.23386	3.72225	1.76684	1.06921	0.493024	22.162	11.0034	5.48379	3.43404	1.57508	0.119355	0.133138	0.1332	0.0948271	0.109706	0.519413	0.422773	0.254204	0.149664	0.0851651	3.50351	1.97276	1.12085	0.503449	0.284949	31.2175	22.6756	12.67	6.68756	2.91265	61.0927	50.4048	66.4152	62.1327	10.1149	0.17195	0.162109	0.135529	0.161874
Post 11	70.3582	21.1052	8.28118	3.54852	2.06618	89.5229	25.3027	10.1967	5.06029	2.36232	16.3754	5.40533	2.13115	0.907465	0.55051	52.8179	17.7164	6.80607	2.96174	1.79014	0.0684963	0.0373405	0.0350829	0.0263529	0.0369344	3.8215	1.15297	0.397726	0.19231	0.114961	10.7869	4.62895	1.4034	0.515673	0.296453	138.525	45.5975	17.6025	6.78089	3.83371	554.564	255.808	51.4444	56.7454	12.2367	0.160311	0.183453	0.148452	0.18809
Pre 12	1.22274	0.893578	0.523627	0.240154	0.109293	4.36808	1.37764	0.720996	0.389803	0.192248	2.16951	2.08512	1.43172	0.546465	0.183105	1.67876	0.930036	0.724539	0.340375	0.180739	0.149926	0.104082	0.107122	0.0800243	0.0892269	0.471138	0.699461	0.913888	0.550638	0.360549	0.802927	1.50642	1.42256	0.492841	0.152791	1.44152	1.90959	2.22721	0.664781	0.232049	2.86593	1.60098	1.26377	0.418734	0.17001	0.321063	0.322934	0.288608	0.252017
Post 12	1.07044	1.23744	0.662414	0.286248	0.109258	4.89804	1.69713	1.04034	0.471557	0.202066	1.87191	3.11538	1.45259	0.643646	0.164928	1.83874	1.16829	0.760673	0.435414	0.187194	0.150539	0.155674	0.144788	0.0937787	0.111859	0.614799	0.708836	0.59675	0.43924	0.227082	0.917972	2.60744	1.3361	0.709794	0.151318	1.56578	4.03749	2.37218	0.927102	0.24335	3.29079	1.49852	1.28829	0.355054	0.150492	0.354214	0.376452	0.301517	0.251905
Pre 13	1.89561	3.02351	1.92825	0.577459	0.406431	2.07031	3.12706	1.93565	0.558455	0.350641	2.85049	3.97778	2.44319	0.925762	0.69458	1.88632	2.75898	1.75242	0.534486	0.28445	0.165016	0.168458	0.136837	0.111934	0.14121	0.742932	1.82695	0.758258	0.274252	0.175238	0.340218	1.0495	0.41776	0.162902	0.120106	0.570661	1.90224	0.702624	0.250395	0.155071	4.91392	4.14632	1.86401	0.723519	0.386106	0.48873	0.376645	0.277358	0.269034
Post 13	2.23071	3.24762	1.55669	0.503389	0.358076	3.86956	3.50649	1.6671	0.563921	0.319945	2.87487	4.59001	2.27256	0.830277	0.678222	1.7361	3.00744	1.45321	0.482927	0.264462	0.130639	0.128429	0.154555	0.0844711	0.10706	0.697142	1.89909	0.49796	0.215972	0.163639	1.11959	1.27186	0.484876	0.169164	0.119291	2.50281	1.94414	0.778584	0.318268	0.165721	1.58664	3.78068	1.23936	0.520799	0.278758	0.374035	0.431586	0.375801	0.31976
Pre 14	7.17741	14.4615	3.93271	1.93898	1.65892	5.01556	10.9291	2.9815	1.81988	1.66949	7.27389	12.1379	3.59922	1.86537	1.64555	4.40178	7.59266	2.46362	1.66414	1.61012	0.0307549	0.0323361	0.0323351	0.0287532	0.0326885	0.773225	3.00477	0.906966	0.605917	1.17228	3.03814	13.7239	2.88742	1.29376	2.08493	4.97279	21.0433	4.23173	2.02416	2.36391	5.0776	7.61004	3.92822	2.19219	1.9688	0.361215	0.249272	0.276451	0.279433
Post 14	11.333	16.7982	3.81576	1.69231	1.71887	12.3694	13.7922	3.40368	1.60007	1.75816	10.8013	14.4533	3.57811	1.70156	1.73669	5.20782	8.75519	2.17021	1.40488	1.61542	0.0705811	0.0812174	0.0438529	0.041026	0.0436411	2.11432	2.77421	0.84513	0.730741	1.18746	6.29463	11.2581	3.67215	1.72514	2.12476	6.84877	13.946	5.47673	2.16644	2.5374	13.1312	9.88965	4.90815	2.09311	1.93863	0.367003	0.359883	0.321583	0.264862
Pre 15	5.2702	17.118	3.20335	1.35463	1.13598	3.27325	10.0212	2.26095	1.12226	1.09442	4.72842	15.0604	2.64165	1.15306	0.932233	4.29751	13.4163	2.4686	1.05357	0.910695	1.23131	0.646755	0.252227	0.175538	0.124243	0.577061	1.27731	0.4363	0.385892	0.445871	8.03794	15.1165	3.23155	1.99127	2.18851	4.12346	19.2844	6.2949	2.84123	3.41379	3.21163	13.2429	5.66516	2.5359	2.74439	0.262457	0.314226	0.2786	0.218234
Post 15	6.07401	11.9505	3.90344	1.7472	1.42271	3.39534	7.91521	2.73153	1.4175	1.37615	4.93147	10.4532	3.13876	1.46445	1.19866	4.40927	9.52135	2.8722	1.35705	1.13541	0.0507729	0.053081	0.0481694	0.0397678	0.0544953	0.613241	1.50677	0.572853	0.41028	0.526359	1.85322	9.16097	3.29968	1.7908	2.7549	3.1488	17.5657	6.86405	4.12175	4.82126	3.29983	13.2788	5.53285	3.53281	3.51369	0.395306	0.34795	0.30828	0.298381
Pre 16	2.27998	7.79713	3.06817	0.989585	0.197265	1.71021	6.3336	1.99829	0.646894	0.153432	2.46102	5.49631	2.58191	0.842501	0.176084	5.86659	4.26466	2.37659	0.672989	0.21993	0.116747	0.120039	0.124921	0.107407	0.103367	1.63758	6.67393	1.79374	0.548287	0.149347	1.75443	10.2664	1.71891	0.523945	0.156687	2.25674	13.8196	2.66741	0.860354	0.177925	2.8067	12.4187	4.72762	1.16389	0.248481	0.240153	0.203442	0.217493	0.188913
Post 16	63.3417	24.2295	4.29339	1.11777	0.176054	48.9871	18.1759	2.99074	0.72224	0.156493	61.2605	20.6133	4.01358	1.03889	0.170555	48.8908	15.4432	2.80137	0.618902	0.147157	0.246905	0.213781	0.214737	0.146851	0.143928	60.4131	23.8816	3.5928	0.723006	0.157066	54.0485	27.0096	3.29117	0.729049	0.177216	50.3747	31.5351	4.61786	1.10642	0.211719	57.9916	31.1442	6.02243	1.36468	0.251627	0.269591	0.209564	0.185107	0.193802
Pre 17	1.92088	4.47472	0.814184	0.40114	0.346201	1.92339	3.93457	1.15295	1.19441	1.00803	2.46356	6.1988	1.07866	0.541592	0.474324	2.65091	5.19969	1.32419	0.768079	0.693489	0.20927	0.172385	0.193191	0.138006	0.138328	0.588956	0.486794	0.304429	0.232418	0.172601	1.77769	6.78521	0.651836	0.473053	0.398807	5.94012	13.7213	1.95158	0.922143	0.644904	5.26402	9.11733	2.51948	1.11076	0.604915	0.404655	0.31161	0.248594	0.292707
Post 17	2.67998	4.9601	0.786317	0.481426	0.418853	2.47821	5.46027	1.13191	1.36715	1.1567	2.89687	5.66515	0.995993	0.628481	0.598504	3.1796	5.58698	1.38365	0.893247	0.759088	0.129851	0.0961856	0.0895215	0.0875939	0.101058	0.565085	0.496624	0.334524	0.214829	0.177586	2.53585	10.0159	0.913272	0.512719	0.548412	7.1876	19.5722	1.51871	1.0863	0.849864	5.36746	9.74254	1.96847	1.21519	0.838269	0.345245	0.309189	0.322381	0.275565
Pre 18
Post 18
Pre 19
Post 19
Pre 20
Post 20
No Pop Pre avg	4.89666	5.87168	1.79774	0.918673	0.532299	5.81233	5.12495	1.77111	0.972072	0.637355	3.61495	4.63328	1.3541	0.687426	0.425475	3.2857	3.69442	1.31619	0.760721	0.559006	0.173912	0.125924	0.0998079	0.0797577	0.0864467	1.70552	1.89031	0.77668	0.465698	0.41245	2.34036	4.81077	1.30927	0.573878	0.466841	6.19958	9.38864	3.01855	1.24495	0.786872	10.8959	8.63291	6.16504	4.77413	1.3703	0.285068	0.271011	0.254461	0.215226
No Pop Post avg	15.4925	8.90627	2.43107	1.09969	0.841109	22.4353	7.99739	2.46969	1.30777	0.800181	7.74495	5.67511	1.46588	0.737324	0.531179	8.52899	4.8487	1.49342	0.869416	0.660653	0.106826	0.11341	0.0967431	0.0768238	0.0867104	5.42492	3.03856	0.793753	0.405454	0.333226	6.9643	6.41731	1.56829	0.662088	0.540615	15.7071	12.8872	3.71453	1.40924	0.961738	43.7751	21.3189	5.10764	4.37792	1.4629	0.294259	0.290911	0.253389	0.227598
% change	3.16389	1.51682	1.3523	1.19704	1.58014	3.85995	1.56048	1.39443	1.34535	1.25547	2.14248	1.22486	1.08255	1.07259	1.24844	2.59579	1.31244	1.13466	1.14288	1.18183	0.614251	0.900625	0.969293	0.963215	1.00305	3.1808	1.60744	1.02198	0.870638	0.807919	2.97574	1.33395	1.19784	1.15371	1.15803	2.53357	1.37264	1.23057	1.13197	1.22223	4.01756	2.46949	0.828485	0.917011	1.06757	1.03224	1.07343	0.995788	1.05748
Pop Pre Avg	7.3841	5.66333	2.10396	1.0534	0.749605	7.98775	4.94918	2.23787	1.2064	0.928666	2.67389	3.89236	1.56931	0.681744	0.536254	5.26437	3.3077	1.59692	0.867502	0.644137	2.57712	0.742096	0.431085	0.328076	0.246971	7.0914	4.56108	2.64405	1.04429	0.662813	3.4652	5.86194	1.88876	0.932439	0.81751	3.75227	8.97483	2.48724	1.0757	0.822015	103.356	58.887	46.6332	20.117	10.1206	0.319414	0.291965	0.272551	0.224752
Pop Post Avg	32.2812	13.7758	6.03598	2.33467	1.25528	32.7262	13.4	5.95702	2.46176	1.39354	12.8938	6.57853	3.12956	1.2518	0.827462	28.9748	11.1972	4.97475	2.08562	1.21144	0.144793	0.116946	0.0998576	0.0748162	0.0804893	28.7651	12.0798	5.78562	2.61262	1.34188	27.7972	12.9419	4.9844	2.09634	1.22053	18.5638	12.3884	4.74862	1.93012	1.26773	150.475	70.768	52.8581	19.405	12.0068	0.326728	0.301052	0.266893	0.220596
% Change	4.37172	2.43245	2.86886	2.21632	1.67459	4.09705	2.70751	2.66192	2.04058	1.50058	4.82212	1.69011	1.99423	1.83618	1.54304	5.50393	3.38519	3.11521	2.40417	1.88071	0.056184	0.157588	0.231642	0.228046	0.325905	4.05633	2.64846	2.18816	2.50181	2.02453	8.02184	2.20779	2.63898	2.24823	1.49298	4.94736	1.38035	1.90919	1.7943	1.54222	1.45589	1.20176	1.13349	0.964608	1.18637	1.0229	1.03113	0.979243	0.981508
POP
pre 1	1.87459	1.73911	0.72123	0.441881	0.225005	0.956102	1.32056	0.804634	0.43498	0.280179	1.12435	1.17452	0.450076	0.281741	0.135521	0.961384	0.825502	0.396943	0.267837	0.138848	0.0849075	0.0799447	0.0543225	0.0506432	0.0437288	0.579448	0.387388	0.348532	0.292484	0.261654	1.235	2.57165	1.02793	0.40822	0.298237	1.66743	7.08266	2.02136	0.519899	0.347364	4.7438	4.15208	2.53321	1.22094	0.754239	0.38335	0.333751	0.330114	0.239207
Post 1	2.73068	1.77151	0.621461	0.407552	0.284415	2.92593	1.4412	0.619798	0.432267	0.380157	4.08464	1.85384	0.600649	0.349505	0.207173	11.8705	3.51802	1.24492	0.589988	0.267558	0.100248	0.131854	0.0701458	0.0771879	0.0760841	1.17027	0.586027	0.409019	0.36434	0.267757	2.12095	2.19004	1.13174	0.524156	0.334543	1.98606	4.67104	2.12458	0.700902	0.379894	10.7419	4.44025	2.41272	1.68308	1.02348	0.418159	0.323995	0.241852	0.266887
pre 2	3.26372	4.28916	1.18882	0.454417	0.211814	2.05815	3.15071	1.31787	0.607732	0.601799	1.89684	3.07751	0.800017	0.291006	0.152058	1.33545	1.97941	0.602054	0.288289	0.252357	0.116058	0.0977726	0.0909392	0.0900927	0.0748534	0.882626	3.04819	0.596485	0.335505	0.192058	1.27042	11.3494	1.10502	0.465649	0.208966	1.92424	17.5651	1.91156	0.697324	0.26716	1.96165	11.249	1.9755	0.551622	0.218351	0.378774	0.34106	0.285272	0.265973
Post 2	2.87962	2.9217	1.48137	0.488567	0.221928	1.35041	1.95867	1.19657	0.519894	0.339912	1.75518	2.08754	0.971938	0.313546	0.158873	1.1575	1.08681	0.727065	0.322394	0.214086	0.113934	0.13767	0.113536	0.0972988	0.107464	0.544727	2.35206	0.687827	0.302433	0.13784	1.63349	11.271	1.39257	0.59859	0.178606	2.28016	11.9535	2.22515	0.709977	0.257412	1.71956	7.87814	2.08224	0.45809	0.191752	0.313725	0.286648	0.326993	0.337251
pre 3	8.81323	6.58281	1.51691	1.25413	1.05984	4.16202	2.42146	0.952726	1.07077	1.0285	8.42425	7.04565	1.81749	1.3682	1.18738	2.18453	1.24846	0.738581	0.989852	1.00393	0.083494	0.0641077	0.0863068	0.0987098	0.0738125	2.36481	3.82628	0.999885	0.913826	0.839802	6.71939	12.7742	1.4518	0.991612	0.872677	4.56616	16.6177	1.86214	1.10672	1.02156	5.08885	5.64534	1.66277	1.41554	1.18264	0.323352	0.291048	0.24838	0.212519
Post 3	8.82351	6.5069	2.09299	1.76255	1.3085	3.42693	2.92295	1.20253	1.62777	1.45291	9.29315	6.39952	2.32891	2.02216	1.5189	1.79363	1.44039	1.02224	1.71854	1.55487	0.133515	0.138945	0.13639	0.118977	0.139099	2.58379	3.76454	1.34746	1.8896	1.65824	8.57927	14.2345	1.83066	1.42154	1.17896	9.44463	13.354	2.65132	1.53708	1.09266	7.24153	4.1292	2.2453	2.09143	1.54895	0.259529	0.272258	0.214381	0.201259
pre 4	4.83534	9.3638	0.944906	0.360439	0.144197	5.20695	9.71651	1.39343	0.678966	0.39629	4.94246	8.65469	0.888779	0.366609	0.128784	13.9258	12.792	3.84369	0.803017	0.306162	0.195901	0.159474	0.124158	0.115921	0.100164	2.94094	7.92009	0.580807	0.274191	0.119132	4.07026	10.3257	0.766399	0.341597	0.120994	4.17368	9.14272	1.02799	0.41714	0.126213	3.0503	4.32027	0.746472	0.368812	0.139255	0.107832	0.115924	0.0966354	0.0554951
Post 4	2.72385	1.5363	1.13101	0.406948	0.15014	3.85922	2.38858	1.65503	1.03384	0.443776	4.55709	1.62767	0.951769	0.403077	0.14434	3.96278	2.44199	1.56669	0.596019	0.228589	0.142163	0.116446	0.121909	0.119114	0.100165	3.40831	2.82832	0.912863	0.375174	0.248145	3.18828	4.1517	0.897033	0.315323	0.147412	2.11228	3.63494	1.06282	0.330489	0.164515	4.14834	2.8666	1.10003	0.445839	0.245252	0.126823	0.144428	0.107234	0.0835219
pre 5	9.57953	14.0399	7.68942	0.939594	0.199136	8.33102	12.6006	7.71115	0.795786	0.207193	9.301	14.0399	7.60404	0.868153	0.191251	8.79269	11.9296	7.46448	0.815247	0.199636	0.0471042	0.0578795	0.0666911	0.0469067	0.0566016	7.95635	11.2103	8.17737	0.737006	0.14557	7.10825	13.4384	7.55578	0.782588	0.14501	7.02592	11.6818	7.74324	0.966683	0.166923	7.01283	8.13296	7.06789	0.921662	0.184297	0.27485	0.358226	0.281957	0.294361
Post 5	9.7071	18.6858	10.3266	0.89273	0.201855	8.50951	16.7639	9.79888	0.748118	0.213217	9.55556	18.0964	10.3825	0.86014	0.185871	9.38768	17.1683	9.98357	0.770711	0.207374	0.0609267	0.0695651	0.0750701	0.0780586	0.0789106	7.84601	17.3881	10.0437	0.813655	0.142394	7.17742	15.7642	9.38851	0.788246	0.127695	7.20363	15.5367	8.54309	0.850276	0.173058	7.60338	12.5264	7.57319	0.748909	0.173156	0.190771	0.245829	0.236301	0.190818
pre 6	1.93652	7.95445	1.03981	0.712076	0.262868	1.34933	5.76204	0.884944	0.632015	0.264124	1.85595	7.79664	1.00778	0.602342	0.22072	0.543839	1.93162	0.335877	0.205777	0.105089	0.0758369	0.0745672	0.0537669	0.0540062	0.0698073	31.9796	8.8966	2.97679	0.604358	0.125008	0.969464	5.62963	0.802893	0.44639	0.13903	1.87055	9.74347	1.3962	0.90062	0.268212	1.93261	11.0729	1.58494	1.43863	0.459345	0.240898	0.250394	0.292237	0.205358
Post 6	1.94261	6.58261	0.998265	0.882368	0.481846	1.50511	5.12921	0.838825	0.736956	0.570991	1.67265	6.43873	0.861306	0.779391	0.361247	0.517305	1.6604	0.331586	0.254172	0.178549	0.0901677	0.0942857	0.0861984	0.0739825	0.116607	131.358	79.8226	21.8668	13.3134	3.7024	1.01352	5.15748	0.919746	0.539121	0.222235	2.16757	10.2091	1.74182	1.2786	0.429018	3.35931	9.68741	2.27916	1.93902	0.782534	0.314319	0.288678	0.263995	0.174716
pre 7	6.14937	4.90672	1.76554	0.626492	0.183788	5.13107	3.1596	1.06185	0.476427	0.160278	6.40005	5.92531	1.83783	0.652397	0.191208	4.24958	2.74835	0.977409	0.569216	0.259919	0.0654305	0.0339436	0.045762	0.0347455	0.0483375	3.01972	1.92587	0.31949	0.237498	0.193374	4.43077	7.92339	0.575321	0.375912	0.178222	5.81635	12.9975	1.80263	0.730362	0.310529	5.86092	4.65306	1.93224	0.697947	0.373411	0.347661	0.281375	0.290876	0.27818
Post 7	5.0103	5.36825	1.76906	0.552209	0.141613	2.66861	3.47574	1.01431	0.361371	0.138517	3.71955	5.68319	1.70568	0.536867	0.149876	2.29924	3.09943	0.902193	0.321204	0.141519	0.229698	0.193866	0.251723	0.164302	0.129545	0.899293	0.855719	0.330701	0.189429	0.151389	1.11305	5.31239	0.494839	0.269887	0.133315	2.76815	12.4	1.52678	0.587592	0.216889	3.1081	5.4575	1.58553	0.641962	0.303092	0.298823	0.364938	0.316162	0.257281
pre 8	6.25666	2.94125	1.77134	1.40968	0.77409	9.80964	4.22592	2.27254	1.19336	0.529043	2.9986	2.19574	1.39427	1.24988	0.49574	7.2494	2.07852	0.963577	0.732555	0.274304	0.100085	0.0902311	0.0419349	0.0527736	0.0526728	0.478308	0.409343	0.320268	0.214074	0.117399	0.769685	0.653012	0.40862	0.331175	0.160857	1.23821	1.19759	0.815933	0.588055	0.250564	122.357	63.1123	28.0202	6.77076	0.70943	0.457664	0.35203	0.290248	0.22619
Post 8	4.11027	3.41262	2.8882	2.62511	2.2767	11.9216	2.54139	1.42441	0.90804	0.519243	6.04189	2.09003	1.35038	0.989766	0.512669	2.72515	1.6552	0.700731	0.491941	0.29365	0.0558139	0.0183012	0.0195268	0.0101226	0.0172419	0.541045	0.467067	0.298699	0.178105	0.108132	0.6798	0.478674	0.369425	0.240925	0.129605	1.06475	1.05346	0.802734	0.632309	0.237472	1.34474	1.33802	0.978709	1.02367	0.397089	0.338478	0.281483	0.304967	0.244744
pre 9	2.57077	4.89604	15.8692	3.25696	5.02956	1.48822	3.53589	12.5752	2.70541	4.3499	1.71151	4.41401	14.1466	2.92385	4.48202	0.883567	2.21211	8.09021	1.81933	2.87839	0.0385292	0.0347301	0.0496727	0.0509694	0.0361892	0.979459	2.31361	8.8659	1.98064	3.12761	0.469581	1.93735	6.68267	1.57293	2.66748	0.752179	4.27522	12.5236	2.5264	3.97777	5.89496	14.2313	48.8487	9.08322	11.7439	0.371515	0.335077	0.32089	0.215596
Post 9	21.6613	11.4461	18.2436	4.29867	5.76757	18.8154	8.42939	15.4057	3.6766	4.92016	8.36339	8.27322	15.8525	3.87334	5.09157	11.8119	5.26655	9.66611	2.38656	3.29339	0.042774	0.0404221	0.0485779	0.0293144	0.0395102	7.68941	5.36575	9.9485	2.56336	3.53062	2.53758	2.99682	6.85274	1.88449	3.02944	4.59637	5.24813	11.6971	3.30026	4.50749	31.1186	21.8494	45.2118	9.96055	11.5332	0.284688	0.347397	0.291452	0.21662
pre 10	11.4248	8.01252	0.879009	0.513285	0.199324	9.46485	6.31317	0.765558	0.396266	0.200425	2.78335	1.24477	0.318484	0.228267	0.113632	2.14454	1.0576	0.304657	0.214207	0.112168	0.0491262	0.0389991	0.0352951	0.0479224	0.0376923	3.06166	2.16642	0.312994	0.214439	0.115946	2.45763	3.83907	0.484756	0.24595	0.13262	7.83985	6.9952	0.845509	0.409151	0.16633	12.0817	12.9337	1.35421	0.646942	0.245422	0.417223	0.352487	0.321467	0.265314
Post 10	4.04198	2.7252	0.510433	0.318126	0.147329	2.86768	1.77583	0.422013	0.279284	0.153064	2.31955	0.939542	0.272168	0.192709	0.0995987	1.24015	0.570958	0.213565	0.157815	0.0989325	0.154787	0.161367	0.171947	0.113162	0.129632	2.35561	1.67542	0.388166	0.181443	0.107298	1.09329	3.5547	0.512011	0.199616	0.090939	2.92348	5.14165	0.567016	0.295789	0.129168	3.60505	8.75994	0.873193	0.406609	0.180196	0.302071	0.323874	0.2972	0.270514
pre 11	0.493988	0.44272	0.582308	0.399127	0.452787	0.861304	0.647656	1.02577	0.777648	0.838194	0.391196	0.441482	0.609115	0.510887	0.592008	0.487603	0.568648	0.870574	0.767643	0.756536	0.144941	0.105579	0.10412	0.105225	0.109811	0.492549	0.552378	0.964826	0.568214	0.655823	0.632213	0.794845	1.30584	0.904981	0.966655	0.813933	1.08703	1.53312	1.17449	1.27567	2.42126	1.51148	1.25697	0.891668	0.885191	0.342684	0.316466	0.221234	0.308995
Post 11	0.623189	0.433027	0.534992	0.58145	0.582654	0.774779	0.508827	0.880438	0.928115	0.989703	0.553382	0.46711	0.6091	0.649058	0.719438	0.738097	0.519569	0.774752	0.963732	0.886357	0.120607	0.180387	0.162387	0.139162	0.121844	0.932501	0.529811	0.76773	0.799733	0.840041	1.41372	0.875654	1.22537	1.15618	1.3373	1.5079	1.17196	1.7698	1.54487	1.69434	2.87045	1.40504	1.30623	1.02656	1.13824	0.316483	0.308508	0.286063	0.304557
pre 12	1.12321	2.54421	3.21004	1.1193	1.12573	1.49626	3.76761	3.13798	1.64589	1.65531	2.21524	4.94358	7.05167	2.46883	2.20234	1.05565	3.20373	4.03736	1.82278	1.71606	0.10878	0.138403	0.173561	0.101149	0.119872	7.94205	4.09513	3.61113	1.67025	1.65365	1.00828	5.93878	7.80713	2.65925	3.19153	1.78316	10.5041	9.99846	2.77856	3.37706	0.610429	1.6893	5.40932	1.32395	1.36652	0.153885	0.197188	0.213065	0.151381
Post 12	1.22915	4.06189	1.44321	1.03157	1.08668	0.894718	3.88419	1.71011	1.65392	1.6886	2.29423	7.97131	3.19918	2.08277	2.23295	1.18905	4.28944	2.0897	1.81776	1.90368	0.142398	0.199322	0.146875	0.139021	0.132093	0.666457	3.7436	1.32479	1.29703	1.75788	0.943085	8.42866	2.51	1.87968	2.68823	1.30954	12.3844	4.66514	2.35725	2.89306	0.467311	3.10032	2.01601	1.05227	1.27776	0.110728	0.118423	0.0882048	0.0665751
pre 13	1.68706	1.36022	0.481861	0.26099	0.134096	1.30892	0.789618	0.454162	0.243712	0.166079	0.961202	0.623315	0.361215	0.181022	0.105581	1.26264	0.810121	0.429757	0.233413	0.152797	0.108338	0.0890153	0.087881	0.0642049	0.0910149	0.62416	0.42785	0.198327	0.109215	0.0707415	1.61122	12.9566	1.27643	0.597255	0.17173	2.42208	25.0387	2.65488	0.897857	0.256296	1.3555	1.91289	0.667035	0.283733	0.168181	0.350812	0.333526	0.3973	0.289557
Post 13	1.01342	1.00071	0.446255	0.286773	0.156882	1.32663	0.582897	0.427435	0.262295	0.1687	0.676808	0.466223	0.253322	0.164223	0.101364	1.29577	0.533163	0.433758	0.276291	0.183578	0.0623099	0.0828533	0.0440993	0.0359773	0.0379798	0.489623	0.362198	0.197015	0.105956	0.0748455	1.75444	11.0223	1.75607	0.572807	0.184843	1.94898	15.0769	2.60538	0.752017	0.274664	1.02039	0.992754	0.446688	0.276679	0.199799	0.357774	0.398945	0.343398	0.27969
pre 14	1.17394	3.4944	1.08884	0.65394	0.97459	1.45376	3.47231	1.17904	0.887315	1.24751	0.833955	1.35193	0.484338	0.280665	0.397122	0.808986	1.54142	0.661825	0.445418	0.671287	0.121215	0.112144	0.0951905	0.0951842	0.0937141	0.488847	0.76681	0.621151	0.399627	0.571568	4.4792	13.7048	5.4867	1.77892	1.74761	1.57761	11.3863	4.74684	2.06868	1.48135	1.69879	4.96072	2.93345	1.1846	1.30585	0.276965	0.381294	0.377471	0.277365
Post 14	1.66368	1.16669	1.22909	0.960425	0.967077	2.60313	1.58163	1.82412	1.30919	1.23402	0.739781	0.548972	0.517954	0.400277	0.393808	1.61654	1.13451	1.04672	0.768905	0.642026	0.03714	0.0487676	0.0317888	0.0257712	0.0274807	0.970861	0.692613	0.604852	0.514049	0.515263	2.54699	2.76799	2.7659	1.68495	1.61706	8.37937	3.76926	2.72898	1.58922	1.52215	3.3561	1.7531	2.11114	1.42469	1.39985	0.376958	0.512408	0.273374	0.272809
pre 15	0.920571	1.21551	0.681651	0.395381	0.14581	1.55108	0.796047	0.457011	0.329181	0.137592	0.814146	1.01882	0.595789	0.351157	0.124747	0.537929	0.391812	0.339268	0.197748	0.113969	0.183714	0.196566	0.199295	0.127481	0.149672	0.518485	0.74289	0.391221	0.18572	0.0986912	0.611771	1.66084	0.580833	0.244813	0.111348	0.905931	2.84686	1.13349	0.500209	0.146441	1.00878	2.42175	1.10671	0.548536	0.150084	0.413703	0.350144	0.239343	0.302032
Post 15	1.37751	2.54095	0.644771	0.443614	0.165071	1.33339	1.5031	0.653414	0.295154	0.148325	1.25157	2.12013	0.591064	0.416647	0.168681	0.857046	0.679104	0.340776	0.212453	0.140633	0.14162	0.136282	0.153887	0.0977656	0.157983	0.872544	0.935948	0.337105	0.194698	0.0936861	0.995985	2.21409	0.496539	0.261319	0.135684	1.38861	4.46052	1.04751	0.509232	0.181622	1.51285	4.09804	1.19524	0.596847	0.164626	0.294707	0.303231	0.402599	0.289562
pre 16	2.36735	7.2501	0.772675	0.789986	0.440455	1.53889	4.14169	0.713007	0.624759	0.445767	2.61431	8.52401	0.934453	0.902039	0.531972	1.48117	4.23144	0.705056	0.587303	0.470208	0.170172	0.0860218	0.0799146	0.0619429	0.0731842	0.439521	1.35097	0.357637	0.273786	0.326258	1.09902	6.15376	0.871824	0.599527	0.669834	2.79639	13.121	2.84676	1.82424	2.1377	1.25961	2.48855	0.834722	0.651948	0.83445	0.305786	0.377073	0.387896	0.292895
Post 16	3.04489	8.96691	2.17679	2.15459	1.35494	8.70376	7.15868	2.07777	1.81938	1.66421	3.56662	9.67889	2.42834	2.54462	1.70342	3.95992	6.4685	2.16216	3.22168	3.06591	0.0361505	0.0369793	0.0457576	0.0432503	0.0415988	2.04257	2.65415	1.68429	2.46297	4.55006	1.94947	6.31547	3.06888	2.05103	2.39808	4.98628	15.8178	11.0432	6.71932	6.91188	7.28114	5.69671	3.62668	2.25692	2.3858	0.443607	0.331767	0.344926	0.260082
pre 17	1.12931	2.89825	0.45515	0.245234	0.110014	1.53641	3.4415	0.450493	0.306652	0.133236	1.10314	2.1749	0.290197	0.152972	0.0804734	1.02525	1.95417	0.344402	0.191669	0.108453	0.163813	0.132208	0.0947271	0.0842738	0.106298	1.06565	2.60268	0.23802	0.18679	0.0952223	1.1261	2.49673	0.370468	0.255664	0.103662	1.51159	4.52955	0.511046	0.371613	0.115986	0.741559	1.7562	0.222082	0.185386	0.0790567	0.413866	0.353035	0.385483	0.263028
Post 17	2.9575	2.53584	0.536847	0.273475	0.121005	4.12562	3.73754	0.663599	0.334503	0.150685	5.16452	2.5878	0.531977	0.206229	0.102473	4.53074	2.51568	0.81716	0.320164	0.14163	0.0411614	0.0353564	0.0497839	0.0305137	0.0472891	3.88888	3.1947	0.475773	0.269821	0.121231	7.15539	5.72667	0.877675	0.366507	0.137403	5.83497	9.4638	0.938243	0.484752	0.128168	1.63016	2.33593	0.356059	0.173265	0.0892805	0.402989	0.306224	0.337724	0.286701
pre 18	0.918514	2.31118	0.611648	0.280857	0.12355	0.998137	2.49781	0.621509	0.35144	0.149954	0.445311	0.973501	0.243215	0.161819	0.082393	0.59533	1.4138	0.352357	0.215899	0.108696	0.130238	0.0928183	0.0864133	0.0848384	0.0911159	0.428862	0.757003	0.315787	0.165414	0.111141	0.818662	1.77033	0.449234	0.183894	0.107893	0.589033	1.19316	0.287753	0.158183	0.075346	2.36636	6.0178	1.16462	0.603818	0.21394	0.305853	0.312159	0.36015	0.248284
Post 18	0.867887	2.02419	0.709106	0.280866	0.113569	1.31457	2.46342	0.888001	0.335109	0.159111	0.442321	0.761744	0.339246	0.15108	0.080538	0.787975	1.31087	0.563935	0.22153	0.105117	0.132794	0.088767	0.101219	0.0691723	0.0857787	0.541963	0.907176	0.295171	0.17474	0.0965724	0.643361	1.70439	0.54529	0.178306	0.0925394	0.584792	1.00907	0.263697	0.14837	0.0776316	1.9734	4.27144	0.939155	0.49602	0.189646	0.409929	0.319593	0.190271	0.227912
pre 19	1.86421	3.33118	0.701658	0.31843	0.126219	1.99491	3.75673	0.961479	0.39208	0.150617	1.68311	3.33321	0.705384	0.313861	0.127579	1.17274	2.25479	0.641087	0.279457	0.103805	0.0983159	0.10503	0.103073	0.111794	0.119845	0.453488	0.96761	0.445481	0.150391	0.0999389	1.15142	2.44899	0.982346	0.271446	0.125757	1.5834	4.67715	1.21914	0.409818	0.160402	2.03124	4.89486	1.10826	0.452309	0.175875	0.403916	0.391389	0.395454	0.298441
Post 19	3.15283	3.10185	1.23071	0.308593	0.126567	3.07486	3.77575	1.57869	0.447963	0.150667	3.01813	2.764	1.13511	0.341527	0.136295	2.13949	2.26848	1.08323	0.300288	0.12843	0.131033	0.164954	0.120296	0.118779	0.129066	0.663579	1.18315	0.489019	0.166039	0.104466	1.63543	2.34358	1.12428	0.323232	0.123876	2.14001	3.46268	1.5186	0.424559	0.148381	3.10094	4.19176	1.67418	0.447993	0.172744	0.412655	0.32949	0.290691	0.261291
pre 20	2.74259	5.84762	0.956722	0.412842	0.158644	0.98527	3.80315	0.694536	0.325276	0.156876	1.70095	6.55297	0.855057	0.406018	0.147765	0.724047	2.29894	0.388305	0.227232	0.113434	0.289769	0.267793	0.194843	0.174428	0.191213	3.05196	1.23685	0.659499	0.252553	0.0977142	0.490156	1.01388	0.38172	0.152732	0.0900765	1.78217	10.311	1.20401	0.461813	0.156933	1.07628	6.64646	0.821506	0.356589	0.130046	0.197857	0.285838	0.220794	0.199868
Post 20	3.27569	5.28492	1.09503	0.329526	0.17474	1.33274	3.17038	0.807798	0.28821	0.159974	1.86111	6.21583	0.982979	0.310998	0.14936	0.874384	2.25979	0.475879	0.183552	0.129848	0.0549541	0.0645681	0.0354039	0.0316422	0.0440417	0.991163	1.23678	0.392447	0.158207	0.106428	0.561929	1.54768	0.536445	0.157686	0.0957993	1.69739	7.11708	1.62773	0.444288	0.159041	0.956199	4.43241	0.857741	0.325992	0.131784	0.272701	0.307125	0.229466	0.247525
pre 21	2.12598	2.68904	1.12311	0.453248	0.38552	1.25099	1.8027	0.831095	0.392467	0.364313	1.10904	0.698544	0.337958	0.143465	0.126922	1.14984	1.43525	0.676599	0.332656	0.292794	0.366761	0.226594	0.172911	0.133314	0.121034	4.23103	1.52242	0.666993	0.302802	0.2054	1.35521	2.79619	2.01978	1.02823	1.41425	1.31361	2.42358	1.64837	0.623589	0.757614	1.9382	1.91726	0.712904	0.375213	0.384138	0.439193	0.34362	0.364801	0.278936
Post 21	34.6268	13.2732	5.12404	1.26305	0.514018	26.5722	9.18375	3.77215	1.16315	0.500063	26.316	2.97537	1.23826	0.445402	0.188748	24.3142	8.90649	3.83	1.10219	0.434848	0.0681089	0.0478875	0.0453745	0.0400606	0.0439906	26.6861	7.99781	2.79421	0.668682	0.213032	30.8349	12.4426	5.74638	2.33432	2.25216	25.754	8.94972	4.35687	1.7001	1.04044	40.4344	13.6241	4.95725	1.3975	0.469858	0.243142	0.310732	0.289981	0.246517
pre 22	0.833086	0.45193	0.298894	0.291488	0.270593	1.62366	0.54915	0.519518	0.526733	0.460569	0.82165	0.298596	0.207665	0.161151	0.13054	0.724687	0.493905	0.341553	0.458772	0.337868	0.169959	0.12598	0.107386	0.124139	0.0991315	0.550013	0.243552	0.16054	0.186998	0.17795	0.67089	0.580008	0.643081	0.282498	0.261598	1.18575	0.885601	0.785787	0.503771	0.431484	2.53839	1.25755	0.50925	0.267517	0.209904	0.235749	0.227376	0.173737	0.164913
Post 22	1.02737	0.539556	0.419704	0.46108	0.737496	13.203	1.83658	0.964101	0.828249	1.42222	16.4852	2.21144	0.959634	0.394197	0.424076	2.7857	1.16358	1.01407	0.55125	0.66743	0.0659328	0.0582808	0.0546829	0.0387559	0.0383525	0.92688	0.372986	0.238786	0.522076	0.782281	0.646982	0.483867	0.461133	0.416363	0.494825	0.84579	0.525226	0.652248	0.87574	1.51179	20.6183	6.87742	4.8854	1.32999	0.783009	0.256953	0.23298	0.222205	0.207604
pre 23	2.78099	2.99604	2.2321	0.731313	0.440728	2.40586	2.08693	1.24736	0.528236	0.395991	2.16129	2.62129	1.96136	0.651465	0.381384	0.230528	0.177524	0.130727	0.0880488	0.0680946	0.169269	0.280034	0.174187	0.136846	0.15157	0.869083	0.491098	0.217321	0.162552	0.0872879	1.25833	1.25471	0.731503	0.398113	0.242374	1.42542	1.58789	0.999202	0.500305	0.3492	0.912939	1.17587	0.832701	0.36676	0.354821	0.257822	0.257531	0.164836	0.211734
Post 23	4.66025	4.56193	2.67831	1.26403	1.0541	4.09304	3.64721	1.51691	0.841814	0.835291	2.31761	3.88022	2.14344	1.02938	0.831288	0.17559	0.201479	0.103137	0.0572476	0.0782006	0.149514	0.184569	0.190216	0.142082	0.126316	0.909194	0.476678	0.263919	0.153386	0.0934151	1.0617	1.68077	0.996376	0.627003	0.429658	1.23507	2.21502	1.22263	0.792311	0.620185	1.116	1.60059	0.884432	0.676209	0.538361	0.236628	0.225084	0.245254	0.191443
pre 24	1.52925	3.02241	1.05517	0.253761	0.132232	1.31788	3.14124	1.05643	0.288518	0.151589	1.18519	2.70254	0.866709	0.261976	0.132597	0.655352	1.44348	0.554893	0.194049	0.114524	0.220213	0.233466	0.24721	0.168678	0.143047	0.475999	0.740748	0.313701	0.139754	0.0927727	0.869014	8.45733	1.87904	0.316632	0.132316	1.10751	11.5272	2.36339	0.502416	0.142288	0.535737	3.72846	0.84298	0.249648	0.130667	0.166162	0.153546	0.141362	0.125096
Post 24	6.04468	3.42127	1.16698	0.593273	0.488026	10.1372	5.06093	1.9546	0.931592	0.64158	5.40548	2.85921	0.997615	0.513111	0.460063	15.4479	4.8561	2.01348	0.764557	0.464098	0.0890882	0.0918469	0.0678175	0.0624526	0.081054	8.68213	1.63866	0.66291	0.648829	0.833894	9.42967	5.1391	1.58058	0.48468	0.490532	22.0122	7.11441	2.22457	0.855697	0.494846	2.89559	2.3286	0.855192	0.685194	0.818498	0.0956377	0.107669	0.121701	0.0996506
pre 25	13.6277	5.97866	1.98809	4.44716	4.43576	4.78066	4.38972	2.42442	4.27713	5.00393	3.87793	3.64092	1.36487	2.33396	2.63598	4.07262	3.58757	2.23687	3.78678	4.18056	0.0422831	0.0791913	0.0560198	0.0378079	0.0294197	4.64606	3.08967	2.92648	4.11617	4.43056	4.76157	5.89317	3.4423	6.18619	6.38498	2.90661	10.6395	3.43045	5.69008	5.58299	4.87014	9.67126	3.89172	6.78418	6.64612	0.103803	0.084486	0.0805628	0.0643751
Post 25	5.55614	9.48093	3.61207	5.47673	4.35833	6.74318	8.47729	4.15536	6.1188	5.01934	3.46333	5.62178	2.09648	3.11574	2.63584	4.36338	6.38827	3.35978	5.1178	4.41204	0.0236644	0.0310638	0.0331608	0.0278095	0.0237922	3.17925	3.95265	3.50515	5.71747	4.46077	4.83685	7.55343	4.67807	7.92574	6.88449	3.86288	13.0804	4.25079	6.78865	5.7034	5.25471	12.9276	5.42994	8.51291	6.76737	0.0842677	0.0945588	0.0991942	0.0521322
pre 26	0.483757	0.582029	0.219754	0.118957	0.0729917	0.520999	0.665614	0.271352	0.145325	0.102825	0.775247	0.81188	0.353558	0.214832	0.122525	0.381766	0.416805	0.173337	0.115279	0.0849218	0.20414	0.244522	0.208102	0.176747	0.226598	0.200613	0.295741	0.154521	0.127367	0.0825355	0.655062	5.38313	0.513646	0.382474	0.144568	1.37088	17.9387	1.02764	0.690762	0.196006	1.43108	3.21438	0.692355	0.365587	0.19709	0.147237	0.16633	0.148846	0.0855778
Post 26	1.17726	0.77709	0.258924	0.199567	0.0884895	1.25842	0.989168	0.28439	0.213762	0.125664	78.3466	26.5806	12.6951	5.18968	1.79118	2.79899	1.31389	0.349396	0.195468	0.10506	0.191355	0.205181	0.176256	0.140934	0.1677	1.13984	0.572397	0.256964	0.186189	0.107857	10.5018	8.75058	1.43409	0.785925	0.271158	5.73862	17.2925	1.5139	0.859101	0.270206	20.9508	6.47632	1.69587	0.764039	0.272362	0.0850603	0.107076	0.0624436	0.06135
pre 27	11.1771	22.1505	2.46619	1.06311	0.305225	11.2145	16.169	2.33887	0.97674	0.387451	10.2891	20.4843	2.26825	1.01153	0.272356	7.38474	14.6581	2.11178	1.08173	0.433162	0.0305555	0.0243815	0.0284584	0.0213262	0.0311843	128.759	84.0607	54.0071	16.4121	3.9206	4.69267	7.56875	1.77574	0.586991	0.226995	8.87263	13.1941	2.57557	1.1025	0.569407	5.77402	10.5508	2.93361	0.942394	0.28332	0.302612	0.348152	0.235069	0.191125
Post 27	11.7502	20.332	4.51287	1.31944	0.65735	16.4113	17.569	4.4123	1.34793	1.10672	8.70206	16.4828	4.11254	1.07174	0.624401	6.99525	14.3659	3.36089	1.33303	2.09943	0.0476785	0.0402344	0.0254195	0.0248693	0.0389688	190.62	85.4205	56.7918	25.1798	5.05317	4.11527	5.05778	2.03224	0.548588	0.376533	7.93494	7.52718	2.57019	1.18293	0.800192	5.15567	5.98625	3.87365	1.25767	0.461161	0.280393	0.288683	0.361495	0.227228
pre 28	2.89284	10.0086	1.48038	0.847004	0.266704	1.6766	5.26862	1.10202	0.681799	0.272867	1.83642	6.49799	0.956248	0.633493	0.209022	1.07944	3.33776	0.696518	0.402065	0.185178	0.120052	0.0913602	0.110199	0.0897329	0.0978645	1.4774	3.9361	0.561684	0.321969	0.181222	2.28259	1.90506	0.48866	0.281173	0.113703	1.9647	6.16942	1.08143	0.68503	0.198483	3.21602	10.7019	1.5452	1.01628	0.304009	0.363573	0.342688	0.355426	0.254619
Post 28	4.34368	11.5702	1.66644	0.760648	0.226681	3.88769	5.84879	1.19982	0.62375	0.244604	2.97827	7.88139	1.10456	0.540487	0.157862	2.05417	4.08236	0.667873	0.420079	0.136626	0.0840334	0.0941511	0.0720434	0.0896509	0.0792497	2.53223	5.71414	0.801033	0.433645	0.116374	6.71671	3.0201	0.80775	0.332332	0.123737	5.49954	8.29784	1.34491	0.493061	0.172733	6.79985	14.5414	1.93721	0.706406	0.233061	0.439056	0.386347	0.317406	0.260398
pre 29	1.89244	2.52235	0.835652	0.396416	0.26355	0.9562	1.56459	0.615261	0.486115	0.349786	1.94886	3.80017	0.956567	0.455626	0.263101	0.769981	0.80931	0.38246	0.243608	0.193549	0.145706	0.0805285	0.0726679	0.0568182	0.043519	0.642701	0.846371	0.42798	0.262461	0.172183	1.29006	7.45203	1.5603	0.675047	0.252561	1.86034	13.6271	1.59165	1.12317	0.348649	1.44874	2.18972	0.963608	0.362019	0.245253	0.329593	0.251107	0.257801	0.218081
Post 29	4.04004	1.89242	1.05792	0.624188	0.472429	3.74278	1.17101	0.857363	0.474561	0.405965	9.64099	2.02051	1.41672	0.620575	0.552528	2.80551	0.788177	0.631006	0.293173	0.240877	0.11001	0.0757209	0.0945122	0.0431657	0.0655585	15.5565	5.19029	2.01185	1.2176	0.685687	2.70592	6.62538	1.24953	0.922796	0.445782	2.44836	11.8044	2.13283	1.25908	0.755207	5.62398	2.12976	1.19087	0.673372	0.704498	0.305465	0.253713	0.312247	0.249742
pre 30	3.2462	1.78502	1.15774	0.412557	0.255553	2.99958	1.56729	1.15828	0.378475	0.258802	2.33155	0.57242	0.417871	0.201185	0.131173	3.5702	1.32981	0.889758	0.468671	0.282796	0.238314	0.16412	0.129575	0.105373	0.123303	2.41747	1.14648	0.71578	0.41922	0.212689	2.49965	1.06414	0.459358	0.236766	0.145058	27.8863	5.82516	2.37428	1.07017	0.641371	35.1229	11.8583	4.28923	1.70618	0.813926	0.426608	0.307152	0.315065	0.296756
Post 30	31.9832	12.4242	5.22603	1.78982	2.2936	44.7152	12.5742	4.33685	2.34378	2.54488	13.3765	4.48729	1.88965	1.27579	2.08119	30.4047	10.1401	4.26066	3.05733	5.32289	0.0321849	0.0376044	0.0434703	0.019781	0.0384317	122.002	29.3836	10.4678	5.20084	6.17709	131.714	27.5359	8.9761	3.07891	1.36257	97.0236	27.5514	10.5528	2.71359	1.54159	1622.13	344.232	94.5201	35.7366	15.9313	0.388434	0.323412	0.38476	0.248865
pre 31	1.07595	2.22498	0.594685	0.312427	0.231414	0.602174	1.11325	0.422017	0.31772	0.266598	0.614412	1.04984	0.317438	0.164236	0.124933	0.544977	1.11465	0.401089	0.233603	0.19339	0.0774564	0.0818811	0.0888001	0.0563401	0.0887899	0.314536	0.272976	0.17873	0.116282	0.0838245	1.10344	7.34178	1.13396	0.543702	0.213441	1.08824	7.46701	1.34804	0.703639	0.238655	1.56723	2.98407	1.26711	0.639322	0.296365	0.421863	0.348592	0.355118	0.267485
Post 31	1.53236	2.86303	0.656082	0.479711	0.273379	0.930694	1.73974	0.63372	0.457654	0.320107	0.709152	1.44309	0.321941	0.244519	0.15231	0.908615	1.52372	0.431711	0.332409	0.223304	0.10856	0.0890474	0.0976682	0.0798945	0.110581	0.366631	0.247155	0.230979	0.146172	0.108828	0.927254	8.37721	1.55433	0.576787	0.310403	1.21662	11.4439	2.42752	0.81404	0.380958	2.33753	4.1886	2.22774	0.767549	0.512089	0.28936	0.519124	0.403438	0.277024
pre 32	21.0934	10.0663	2.06801	1.2935	0.374596	1.87251	6.47618	1.68251	1.04246	0.357108	1.11265	4.11631	0.98662	0.569228	0.171225	1.39816	3.47166	0.934605	0.607353	0.224578	0.13936	0.107708	0.083736	0.0863849	0.0982456	0.654566	4.46278	0.795726	0.443815	0.237436	0.617292	5.45892	0.663251	0.338834	0.152615	7.32175	11.0748	1.85629	0.899052	0.228048	1.59193	4.67926	1.4523	0.908042	0.289075	0.295658	0.360482	0.276251	0.231403
Post 32	3.96678	8.4099	2.39446	1.28858	0.341384	2.67817	5.41173	1.73478	1.10562	0.395499	3.5957	4.06668	1.44605	0.68055	0.278442	1.8171	2.74941	1.00695	0.630786	0.280812	0.0996636	0.0808115	0.0673713	0.06013	0.0786967	1.13731	3.54705	0.815772	0.396	0.218624	0.911695	6.15992	0.553983	0.338148	0.14909	1.51374	11.8901	1.36622	0.750609	0.235408	34.438	18.0774	8.24112	2.75639	0.909611	0.31837	0.303573	0.290702	0.274885
pre 33	123.785	40.7063	16.0444	11.3977	6.41917	200.6	52.0928	25.1997	17.3997	10.1163	7.96791	4.79884	2.79092	2.27207	1.89722	123.98	31.9004	16.2095	11.7676	6.61753	97.7621	25.1906	13.2802	9.80366	6.32185	46.8188	11.7797	6.63647	4.92414	3.89435	53.4212	21.4289	9.03302	7.0593	6.37049	8.65592	6.40188	1.84571	1.40889	1.28569	22.8916	7.67645	3.38157	2.17453	1.43572	0.359806	0.315716	0.309366	0.290631
Post 33	917.893	311.928	127.377	47.5235	15.5662	962.027	315.293	131.193	49.843	16.3475	173.567	58.9456	25.8758	9.83558	3.42772	846.614	272.288	112.283	41.5439	13.9079	0.0780803	0.0670188	0.0466568	0.0369763	0.027229	506.515	172.379	73.1676	28.8914	10.0692	750.991	252.954	98.9463	40.3143	13.9178	360.531	121.195	51.2997	19.7891	6.86998	339.663	107.374	46.5988	17.2174	5.73651	0.344532	0.362987	0.281298	0.234484
pre 34	14.6792	8.29484	1.70449	0.876325	0.92636	4.68499	7.63736	3.06082	1.60387	1.77732	3.50982	7.55573	1.78033	0.947354	1.11224	1.22567	2.59615	0.829161	0.509694	0.628403	0.160548	0.137094	0.127128	0.0700689	0.110287	0.731073	1.36588	1.36947	1.00128	1.24296	0.838598	1.97551	1.19412	0.762695	0.876335	1.60708	4.48501	1.91615	1.08269	1.0089	1.01795	4.05508	1.30817	1.07161	0.98172	0.36382	0.395186	0.39152	0.265739
Post 34	35.5536	8.36575	2.57029	1.4509	1.21506	41.85	9.28655	4.65355	2.22419	2.62995	5.34222	6.2637	1.845	1.26037	1.26186	2.20261	2.12249	0.793583	0.670767	0.767786	0.0633312	0.0469157	0.0704271	0.0392356	0.0474506	1.57515	1.73947	0.993661	1.14093	1.20608	1.95106	2.33233	0.913784	0.895959	0.864978	3.12131	6.33767	1.88955	1.22373	1.02711	1.66232	5.59462	1.74211	1.08857	0.948065	0.407286	0.338102	0.290342	0.268774
pre 35	4.27362	7.46894	1.34712	0.746574	0.2124	3.82609	5.54939	1.16055	0.6452	0.288912	2.52539	3.57731	0.739101	0.393933	0.120042	2.65917	3.38032	0.889233	0.422471	0.171636	0.122466	0.100789	0.0955431	0.061359	0.076771	4.21177	5.75145	1.06654	0.594294	0.260574	6.5551	24.5077	2.48231	0.89017	0.29906	8.68711	45.9902	4.58606	1.38286	0.33678	181.254	162.543	49.2115	22.2488	6.12968	0.303897	0.323283	0.361386	0.289258
Post 35	2.85469	9.18422	0.644145	0.57288	0.182129	2.16892	6.48553	0.586198	0.455124	0.208275	1.72609	4.05553	0.377843	0.379166	0.108038	1.3511	3.45733	0.388172	0.292585	0.126244	0.0710144	0.0730058	0.0510138	0.0369982	0.0454029	1.46999	5.11983	0.467944	0.362794	0.160648	3.61488	25.4136	2.33655	0.644726	0.235492	6.38431	38.0557	5.04308	1.21308	0.321805	55.9856	97.7589	17.4264	10.3263	3.6356	0.266681	0.345849	0.33782	0.28028
pre 36	5.64324	3.15205	1.85366	0.858292	1.44693	4.61029	2.43752	2.05611	1.02585	1.72545	3.10457	2.06503	1.29607	0.619725	0.99867	2.08469	1.19486	0.975229	0.50054	0.792559	0.00147865	0.0010021	0.000650288	0.000337525	0.00021315	1.98605	1.28041	1.18604	0.656484	1.00784	2.80482	2.4586	1.78124	0.706063	1.0212	4.12923	4.87893	3.04395	1.02758	1.30433	6.58011	6.52014	3.95114	1.02396	1.3047	0.00634826	0.00421059	0.00351929	0.00265313
Post 36	122.833	32.4208	26.0276	6.02663	4.0001	71.2005	49.4745	25.5371	8.72061	5.16317	78.4269	21.795	17.7217	4.15021	2.78462	57.6763	15.8128	12.9149	3.58386	2.26296	0.0721453	0.0813161	0.0703317	0.0553759	0.0562175	87.197	24.5075	22.4402	5.52025	3.72846	90.5718	25.9212	21.4673	4.82278	3.12708	111.425	31.197	25.5019	5.92007	3.55663	110.516	28.9872	25.5514	5.96338	3.80023	0.033485	0.0334017	0.0283012	0.0210128
pre 37	6.17758	2.60802	2.53826	1.47265	0.728131	8.38868	3.11424	3.08852	1.49532	0.844641	0.984239	0.511641	0.379602	0.331945	0.254257	5.62483	2.35543	2.17675	1.26201	0.653259	0.454454	0.1221	0.11953	0.0976056	0.0653081	4.50782	1.17146	0.906676	0.420265	0.269285	5.0907	3.7115	2.5286	1.46212	1.31918	9.86263	6.12611	4.88316	2.47384	1.57938	3669.73	1929.14	1670.5	731.483	360.398	0.856351	0.21216	0.242157	0.168702
Post 37	8.29435	4.19581	3.56993	1.48047	0.935509	7.93839	3.92601	3.36104	1.41906	1.10862	3.27838	1.47034	0.941541	0.489281	0.3827	7.59654	3.77471	3.29278	1.27138	0.858404	2.05917	0.868864	0.45399	0.202507	0.113555	3.03151	1.3242	0.950744	0.433796	0.35185	6.46367	5.5317	4.27545	1.72824	1.55157	10.6656	7.70768	6.67665	2.41246	1.99484	3635.38	2039.88	1805.79	655.393	411.153	1.77905	0.746866	0.46866	0.190698
pre 38	0.83058	0.656912	0.4652	0.365388	0.246621	0.762185	0.673721	0.558377	0.459054	0.470546	0.503937	0.461383	0.324703	0.24894	0.136421	0.791727	0.648337	0.51582	0.384333	0.329556	0.0635582	0.0658158	0.0466612	0.0379031	0.0729785	0.557457	0.420554	0.204812	0.143937	0.0970768	1.58781	2.34174	0.992136	0.523931	0.406308	1.26209	1.83786	0.97343	0.611609	0.755482	1.63038	2.90097	2.08944	1.48075	2.2433	0.301604	0.327377	0.273926	0.218254
Post 38	0.763505	0.586809	0.385842	0.33369	0.315074	0.680263	0.658255	0.447055	0.482573	0.46947	0.577756	0.418183	0.272483	0.213011	0.169683	0.76588	0.619795	0.459416	0.443875	0.420529	0.0515145	0.0502138	0.0397677	0.0438069	0.0532374	0.759417	0.497095	0.302892	0.17705	0.125918	1.26152	2.21559	0.734148	0.538428	0.500561	0.969928	1.70446	0.747807	0.678324	0.858429	1.62884	3.27877	2.05694	1.68485	2.16103	0.383331	0.309283	0.167439	0.222845
pre 39	2.93458	2.02575	1.09879	0.597657	0.262007	1.83002	1.27932	0.716017	0.402993	0.243546	3.05758	2.27086	1.37916	0.750037	0.340851	0.492071	0.275989	0.187096	0.110645	0.0952691	0.121391	0.1651	0.121525	0.10446	0.117629	9.08134	3.18121	1.23085	0.614236	0.248566	2.28273	1.52525	0.956	0.562142	0.197011	2.56904	1.9384	1.76452	0.708771	0.240685	3.57918	2.63978	2.1687	0.872224	0.274003	0.347892	0.329607	0.290536	0.25337
Post 39	2.45748	1.11383	1.3343	0.78713	0.449499	1.56756	1.09565	0.970659	0.541896	0.423133	4.19816	1.12952	1.1981	0.666664	0.36017	82.6787	33.2729	11.5674	5.79708	1.7871	0.165856	0.168927	0.171991	0.0988701	0.108767	4.88453	1.80435	1.04984	0.452341	0.283771	1.64822	0.906589	1.2578	0.663702	0.357105	4.16877	2.26109	1.86661	0.896895	0.39849	2.94024	1.50733	2.2589	0.989402	0.434274	0.381518	0.440656	0.343832	0.299387
pre 40	3.15654	1.72156	0.658053	0.355406	0.226184	1.90406	1.06785	0.57057	0.306647	0.209244	3.03769	1.65231	0.69159	0.341878	0.19842	0.332527	0.208964	0.0764346	0.0562689	0.0398126	0.0988403	0.104366	0.105029	0.100905	0.120519	0.774474	0.779734	0.733002	0.639602	0.589097	1.44262	1.99168	0.898514	0.463978	0.316153	2.37424	2.98102	1.30885	0.729255	0.599352	2.04471	2.27666	1.53576	0.743942	0.582541	0.278507	0.270506	0.204478	0.221328
Post 40	7.05425	1.61686	0.646076	0.405814	0.211106	3.90881	1.07702	0.620338	0.33549	0.183564	6.36793	1.48132	0.662014	0.368796	0.207309	0.479053	0.173551	0.115393	0.0702561	0.0552082	0.136609	0.144206	0.13561	0.0967154	0.115606	0.975116	0.76123	0.408778	0.74143	0.583701	2.24743	1.51682	0.678438	0.460272	0.292101	3.87712	2.44932	1.15313	0.789	0.576547	5.30684	2.13876	1.33307	0.797611	0.472834	0.204569	0.196759	0.25996	0.1692
[truncated: 21 more columns]
